# Supplementary material for: Availability of mRNA Obtained from Peripheral Blood Mononuclear Cells for Testing Mutation Consequences in Dystrophic Epidermolysis Bullosa
Source: MDPI journal article supplement (doi:10.3390/ijms222413369), 2021-12-13
Supplement: s1 [file s1]

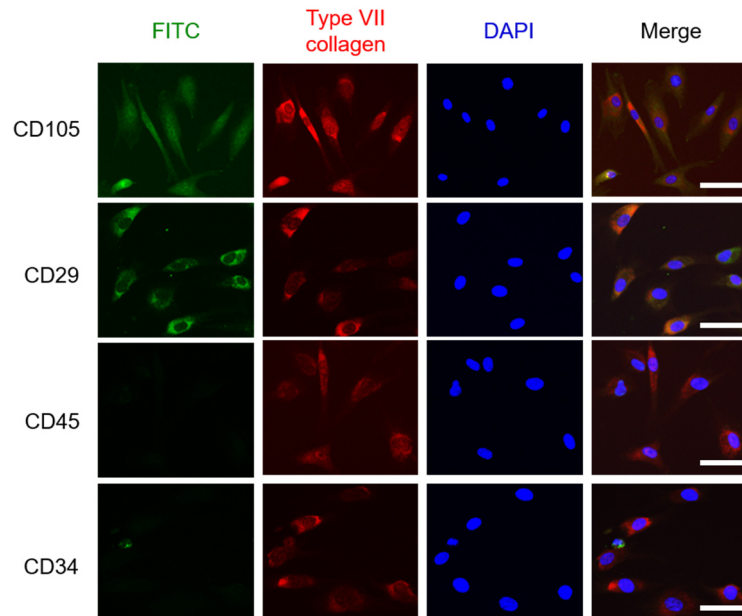

**Figure S1.** Immunophenotyping of cultured mesenchymal stem cells. Immunofluorescence staining for lineage markers CD105, CD29, CD45, and CD34 (green); type VII collagen (red); and nuclear component (blue). Scale bar, 100  $\mu$ m. DAPI, 4',6-diamidino-2-phenylindole; FITC, fluorescein isothiocyanate.
